# Supplementary material
Source: PubMed Central journal article supplement (PMC4208607)
Supplement: Supp_Fig2.pdf [file Supp_Fig2.pdf]

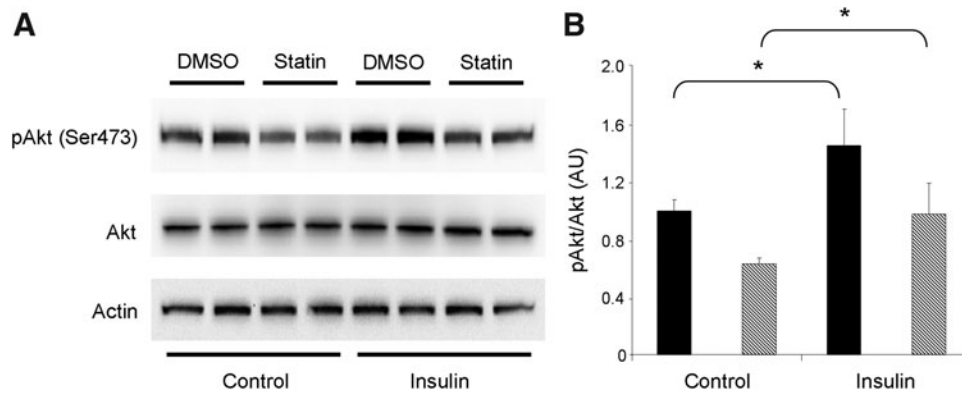

**SUPPLEMENTARY FIG. S2. Akt sensitivity to phosphorylation remains intact after statin treatment.** (A) HL-1 cells treated with DMSO or 1  $\mu$ M simvastatin for 24 h were further treated with 100 nM insulin for 30 min before harvest. Akt phosphorylation (Ser473) was assessed in control and insulin-treated cells. (B) Results from (A) were quantified.  $n=4$  plates per group. \* $p$ -value < 0.05. Akt, protein kinase B.
