# Supplementary material
Source: PubMed Central journal article supplement (PMC4208607)
Supplement: Supp_Fig3.pdf [file Supp_Fig3.pdf]

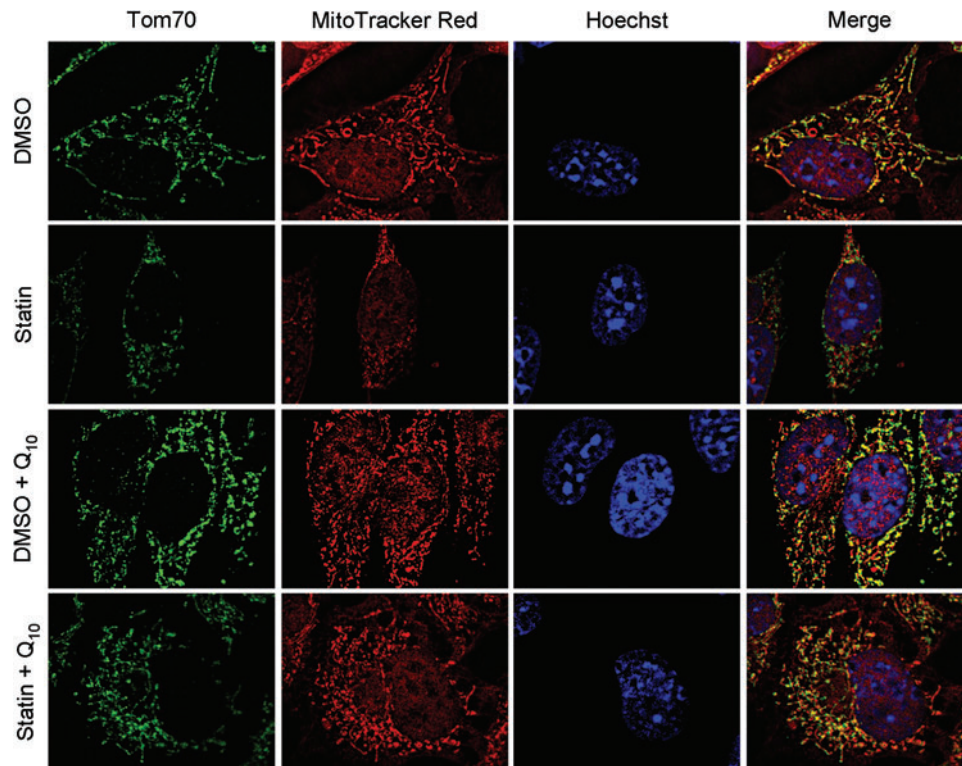

**SUPPLEMENTARY FIG. S3. Statin treatment lowers mitochondrial membrane potential.** Representative images of HL-1 cells 24h after addition of DMSO or  $1\mu\text{M}$  simvastatin, with or without  $5\mu\text{M}$  coenzyme  $\text{Q}_{10}$ . Cells were loaded with membrane potential-sensitive MitoTracker Red CMX Rosamine for 30 min at the end of treatment, fixed with 4% paraformaldehyde, and immunostained for Tom70. Nuclei were stained with Hoechst 33432. Cells were used for ratiometric calculations of MitoTracker Red CMX Rosamine (Red) to Tom70 (Green) fluorescence in Figure 5C. Tom70, translocase outer membrane 70 kDa subunit.
