# Supplementary material
Source: PubMed Central journal article supplement (PMC4208607)
Supplement: Supp_Fig4.pdf [file Supp_Fig4.pdf]

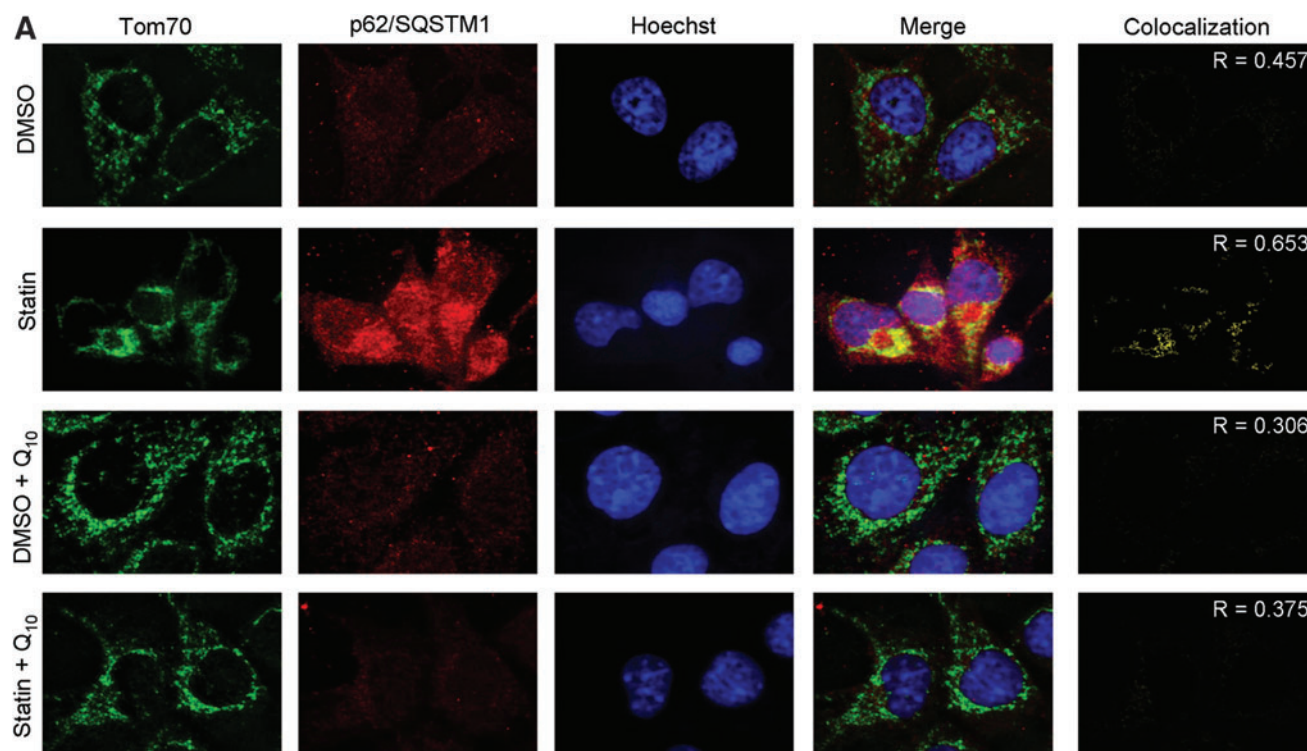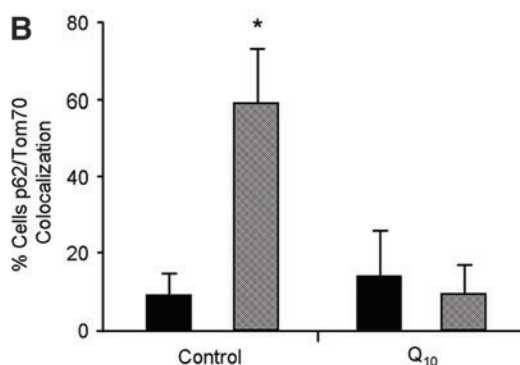

**SUPPLEMENTARY FIG. S4. Coenzyme Q<sub>10</sub> blocks statin-mediated p62/SQSTM1 translocation to the mitochondria. (A)** Representative images of p62/SQSTM1 translocation to the mitochondria in cells given DMSO or simvastatin (1  $\mu$ M) with or without 5  $\mu$ M coenzyme Q<sub>10</sub>. p62/SQSTM1 (red) and Tom70 (green) were immunolabeled and nuclei were stained with Hoechst 33432. To emphasize colocalization between p62/SQSTM1 and Tom70, processed images were thresholded for yellow color representing colocalized points (p62/SQSTM1 and Tom70). **(B)** HL-1 cells treated with simvastatin (1  $\mu$ M, hashed bars) or vehicle control DMSO (solid bars) were scored for p62/SQSTM1 translocation to the mitochondria. Cells exhibiting more than 50% colocalization of p62/SQSTM1 to mitochondria were counted as positive.  $n=4$  plates per group. \* $p$ -value < 0.05.
