# Supplementary material
Source: PubMed Central journal article supplement (PMC4208607)
Supplement: Supp_Fig5.pdf [file Supp_Fig5.pdf]

**A**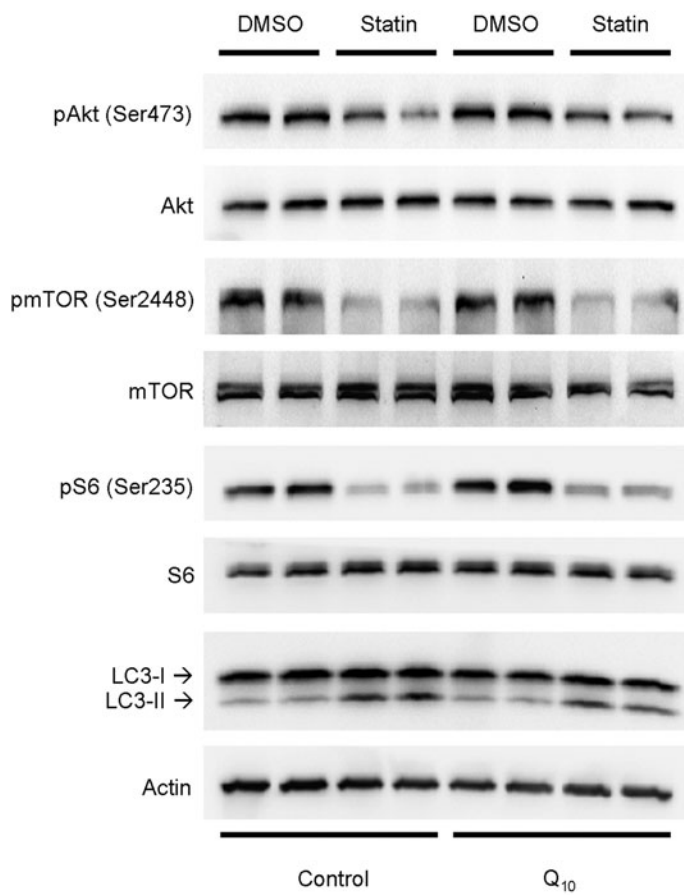**B**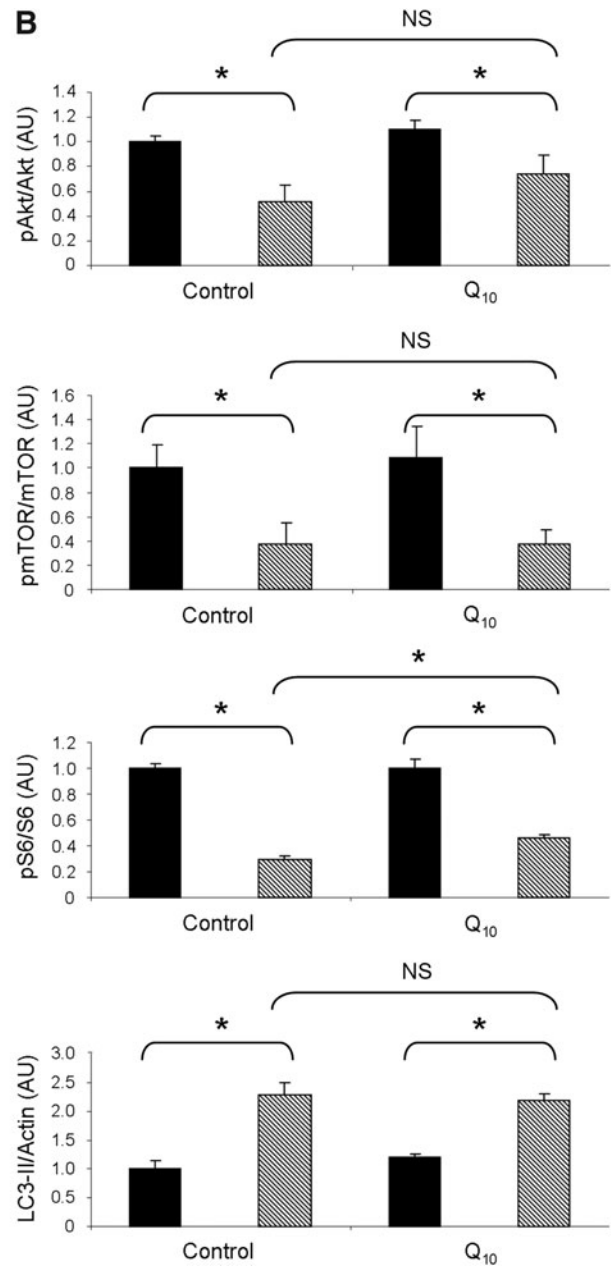

**SUPPLEMENTARY FIG. S5. Coenzyme Q<sub>10</sub> does not abrogate attenuation of Akt/mTOR signaling by statin.** (A) HL-1 cells treated with simvastatin (1  $\mu$ M, hashed bars) or DMSO (solid bars), and supplemented with or without coenzyme Q<sub>10</sub> (5  $\mu$ M) for 24 h, were examined for markers of the Akt/mTOR pathway and autophagy. Representative blots are shown. (B) Quantitation of results shown in (A), with  $n=4$  plates per group; experiments were performed at least twice with similar results. \* $p$ -value < 0.05. mTOR, mammalian target of rapamycin.
