# Supplementary material
Source: PubMed Central journal article supplement (PMC4208607)
Supplement: Supp_Fig6.pdf [file Supp_Fig6.pdf]

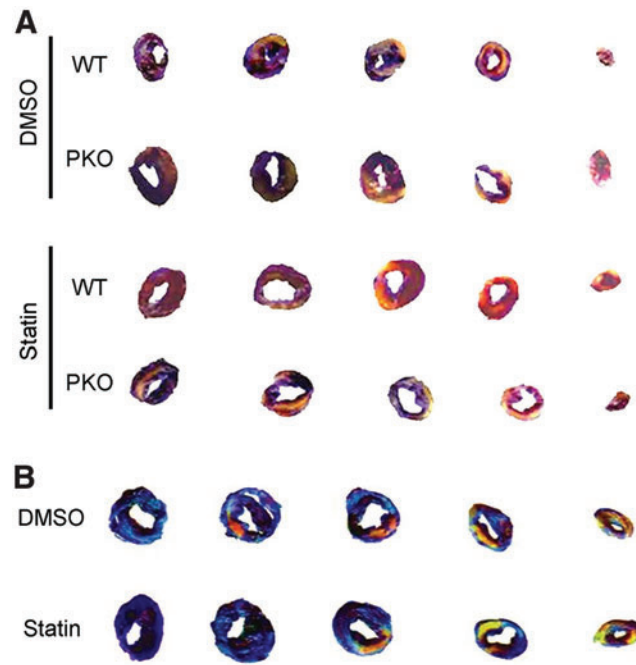

**SUPPLEMENTARY FIG. S6. Representative heart slices from *in vivo* studies.** Hearts were perfused with Evan's Blue to demarcate area-at-risk, then sliced and stained with triphenyltetrazolium chloride to reveal viable tissue. **(A)** Simvastatin or DMSO-treated wild-type or Parkin knockout (PKO) mice. **(B)** Simvastatin or DMSO-treated wild-type mice also given coenzyme Q<sub>10</sub>.
