# Supplementary material
Source: PubMed Central journal article supplement (PMC4208607)
Supplement: Supp_Fig7.pdf [file Supp_Fig7.pdf]

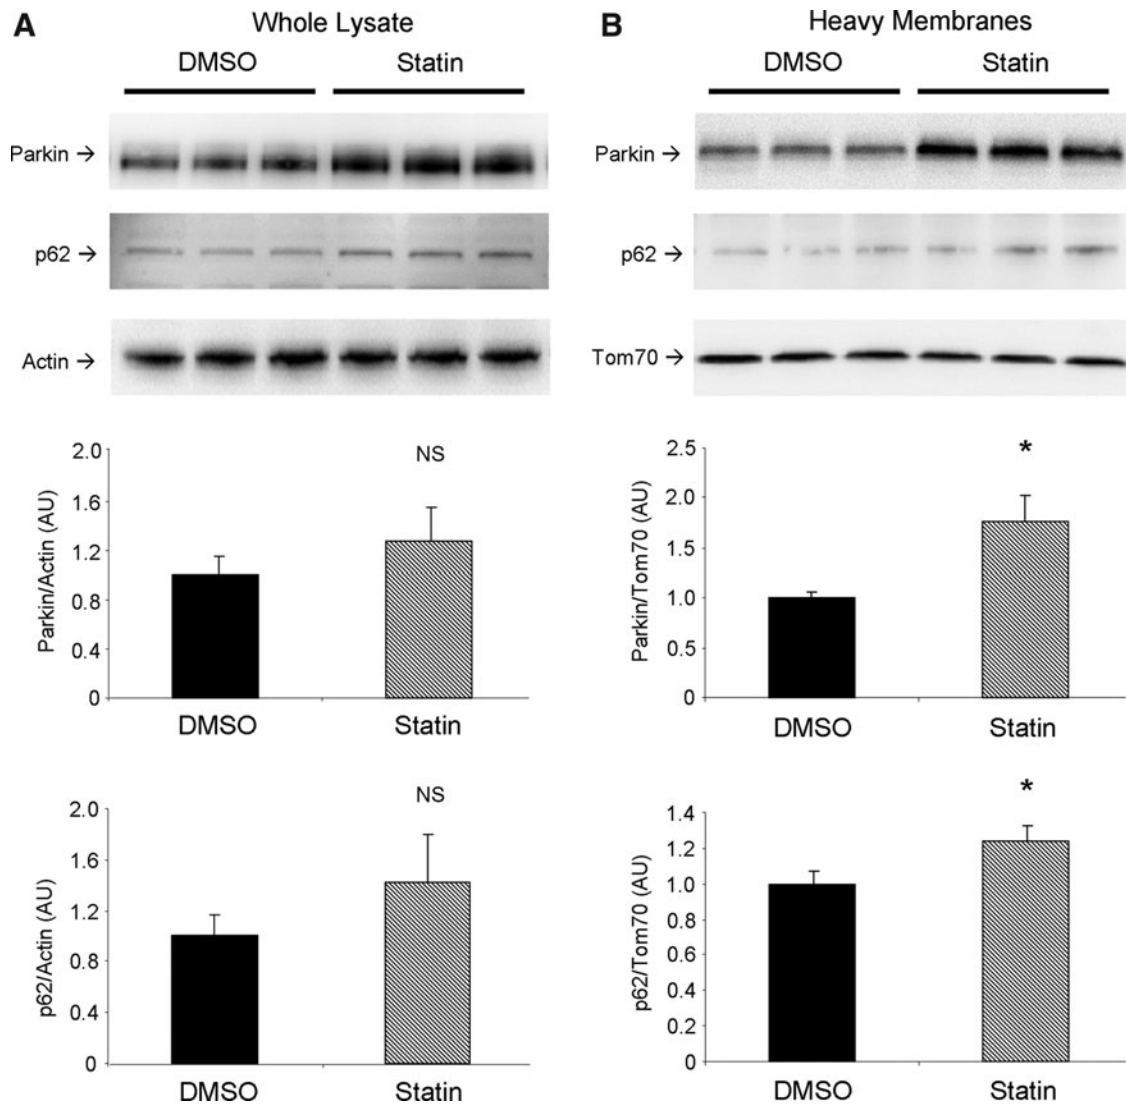

**SUPPLEMENTARY FIG. S7. Parkin and p62/SQSTM1 levels and mitochondrial translocation *in vivo*.** (A) Postnuclear supernatants (whole lysate) from hearts of vehicle- or statin-treated mice (20 mg/kg; 4 h before sacrifice) were analyzed for Parkin and p62/SQSTM1 levels by western blot. Densitometric quantitation of Parkin and p62 in the whole lysates is shown.  $p=NS$ ,  $n=3$ ; experiments were performed at least twice with similar results. (B) Heavy membrane subcellular fraction (enriched for mitochondria) from the same samples were examined for Parkin and p62/SQSTM1 translocation. Densitometric quantitation of Parkin and p62 in the mitochondrial fraction (heavy membranes) is shown. \* $p$ -value  $< 0.05$ ,  $n=3$ ; experiments were performed at least twice with similar results.
